# Supplementary material for: Functional chimeras of flagellar stator proteins between E. coli MotB and Vibrio PomB at the periplasmic region in Vibrio or E. coli
Source: PubMed Central journal article supplement (PMC4398512; doi:10.1002/mbo3.240), 2015-01-29
Supplement: mbo30004-0323-sd1.pdf [file mbo30004-0323-sd1.pdf]

|        |     |                         |                         |                         |                         |                         |     |
|--------|-----|-------------------------|-------------------------|-------------------------|-------------------------|-------------------------|-----|
| StMotB | 1   | .....10                 | .....20                 | .....30                 | .....40                 | .....50                 |     |
| VaPomB | 1   | -----M                  | DDEDNKDCP               | PPGLPLWMGT              | FADLMSLLMC              | FFVLLLSFSE              | 41  |
|        |     |                         | .....10.                | .....20.                | .....30.                | .....40.                |     |
|        |     | ↓59                     |                         |                         |                         |                         |     |
| StMotB | 51  | SSPKELIQIA              | EYFRTP <del>L</del> ATA | -----VT                 | GGNRIAN---              | SESP <del>I</del> PGGGD | 89  |
| VaPomB | 42  | MDVLKFKQIA              | GSMKFAFGVQ              | NQLEVKDIPK              | GTSIIAQEFR              | PGRPEPTPID              | 91  |
|        |     | .....50.                | .....60.                | .....70.                | .....80.                | .....90.                |     |
|        |     | 50↑                     |                         |                         |                         |                         |     |
|        |     | 90↓91                   |                         |                         |                         |                         |     |
| StMotB | 90  | -----DYT                | QQQGEVE---              | -----                   | -----                   | -----                   | 99  |
| VaPomB | 92  | VIMQQTMDIT              | QQTLEFHEGE              | SDRAGGTKRD              | EGKLTGGQSP              | ATSTONNESA              | 141 |
|        |     | .....100.               | .....110.               | .....120.               | .....130.               | .....140.               |     |
|        |     |                         |                         |                         | 135↑                    |                         |     |
|        |     |                         |                         |                         |                         |                         |     |
| StMotB | 88  | -----                   | 100.....                | 110..... $\alpha$ 1     | 120.....                | 130..... $\alpha$ 2     | 137 |
| VaPomB | 142 | EADMQQQSK               | EM-----                 | -----SQEME              | TLMESIKKAL              | E--REIEQ--              | 174 |
|        |     | .....150.               | ..                      | .....160.               | .....170.               | .....180.               |     |
|        |     |                         |                         | $\alpha$ 1              | 168↑                    | $\alpha$ 2              |     |
|        |     |                         |                         |                         |                         |                         |     |
|        |     | ↓138 $\beta$ 1          |                         |                         |                         |                         |     |
| StMotB | 138 | PHLKIDL <del>V</del> QE | GLRIQIIDSQ              | NRPMFKT <del>G</del> SA | EVEPYMRDIL              | RAIAPVLNGI              | 187 |
| VaPomB | 175 | GAIEVENL <del>G</del> Q | QIVIRMR---              | EKGAFPE <del>G</del> SA | FLQPKFRPLV              | RQIAELVKDV              | 221 |
|        |     | .....180.               | .....190.               | .....200.               | .....210.               | .....220.               |     |
|        |     | 175↑                    | $\beta$ 1               | $\beta$ 2               | $\alpha$ 3              |                         |     |
|        |     |                         |                         |                         |                         |                         |     |
|        |     |                         |                         |                         |                         |                         |     |
| StMotB | 188 | PNRISLAGHT              | DDFPYANG <del>E</del> K | GYSNWEL <del>S</del> AD | RANASRREL <del>V</del>  | AGGLDNGK <del>V</del> L | 237 |
| VaPomB | 222 | PGIVRVSGHT              | DNRPLDS- <del>E</del> L | YRSNWDL <del>S</del> SQ | RAVSV <del>A</del> QEME | KVRGF <del>S</del> HQRL | 270 |
|        |     | .....230.               | .....240.               | .....250.               | .....260.               | .....270.               |     |
|        |     | $\beta$ 3               |                         |                         | $\alpha$ 4              |                         |     |
|        |     |                         |                         |                         |                         |                         |     |
|        |     |                         |                         |                         |                         |                         |     |
| StMotB | 238 | RVVGM <del>A</del> TMR  | LSD--RGPDD              | AINRRISLLV              | LNKQAEQAIL              | HENAESQNEP              | 285 |
| VaPomB | 271 | RVRGM <del>A</del> TEP  | LLPNDSDDNR              | ALNRRVEISI              | MQGEPLYSEE              | VPVIO-----              | 315 |
|        |     | .....280.               | .....290.               | .....300.               | .....310.               | .....                   |     |
|        |     | $\beta$ 4               | $\alpha$ 5              | $\beta$ 5               |                         |                         |     |
|        |     |                         |                         |                         |                         |                         |     |
| StMotB | 272 | VSVLQQPAAA              | PPASVPTSPK              | AEPR                    | 309                     |                         |     |
| VaPomB |     | -----                   | -----                   | -----                   | -----                   |                         |     |

Fig. S1 Nishino et al.

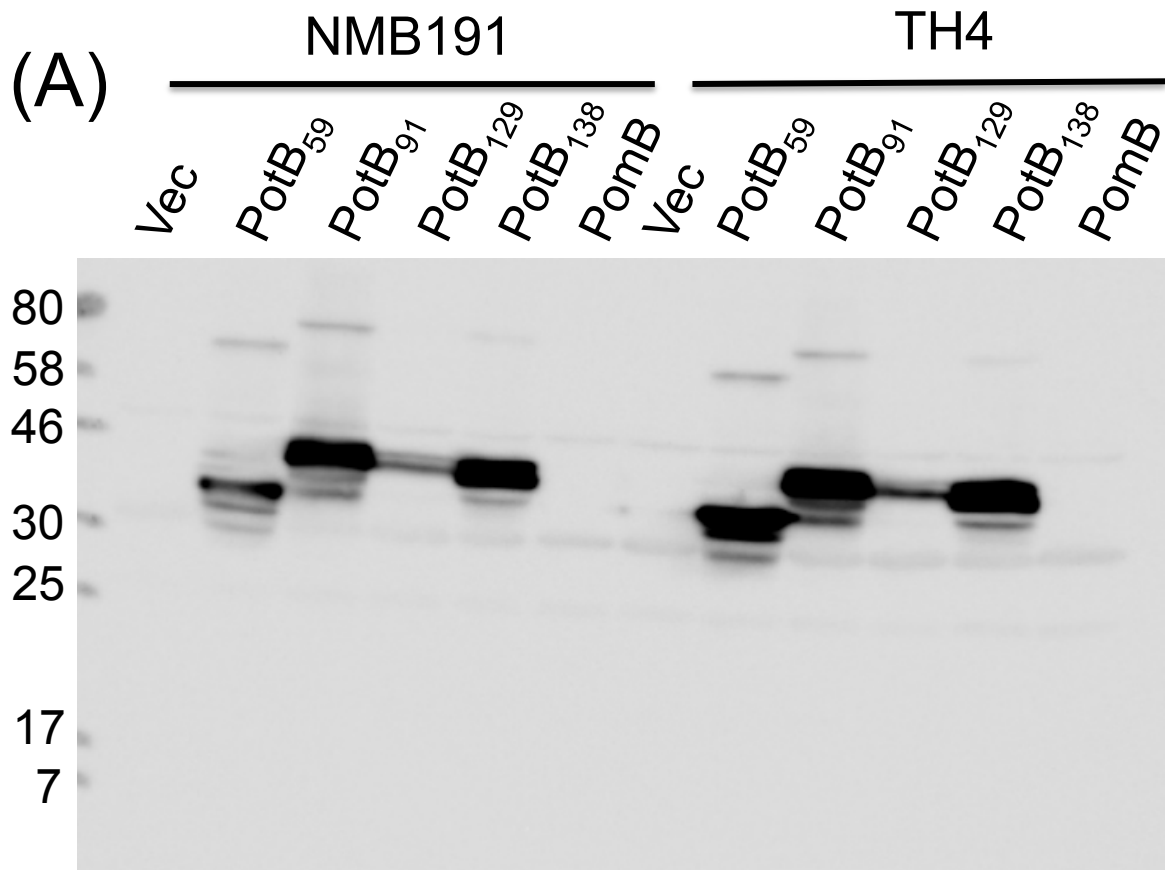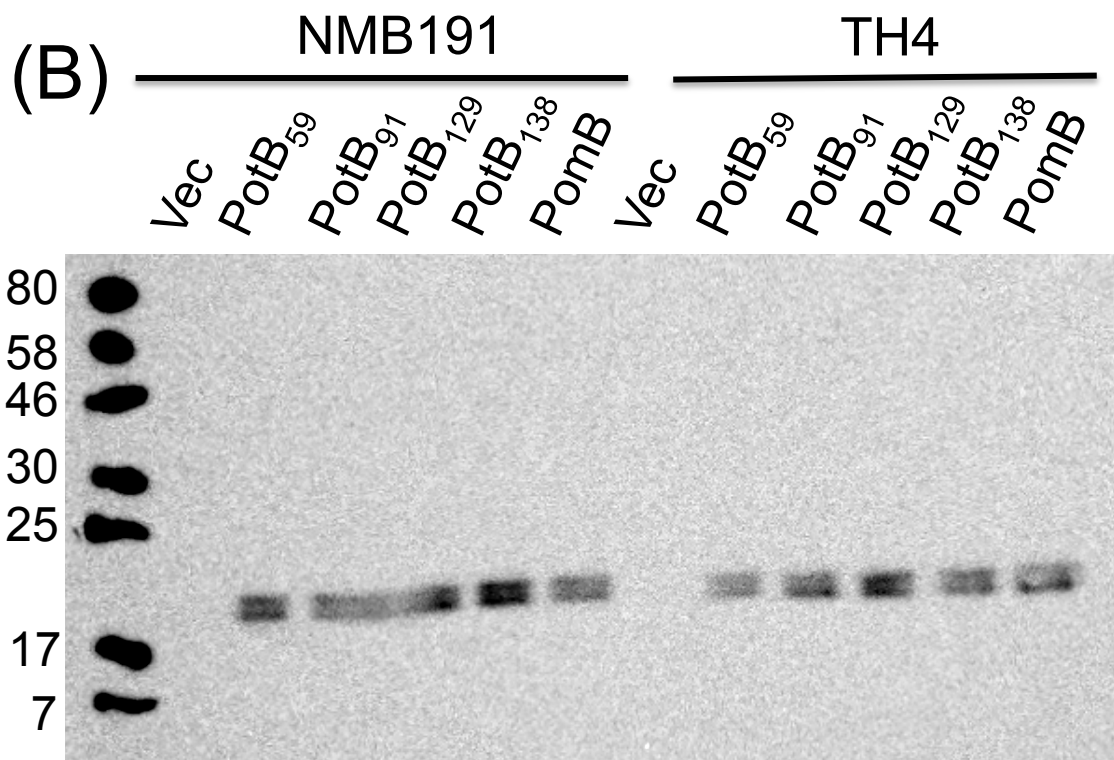

Fig. S2 Nishino et al.

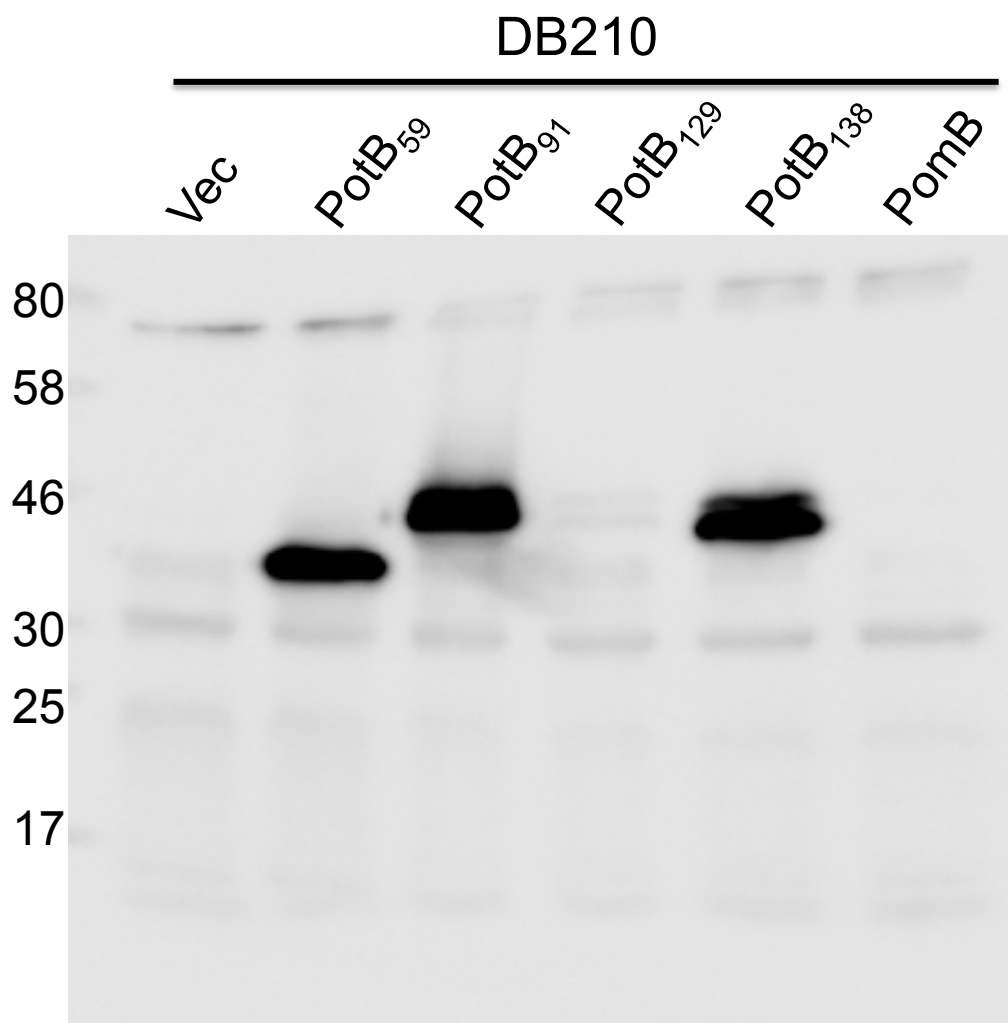

Fig. S3 Nishino et al.
